# Supplementary material for: Caries Severity, Decayed First Permanent Molars and Associated Factors in 6–7 Years Old Schoolchildren Living in Palermo (Southern Italy)
Source: MDPI journal article supplement (doi:10.3390/jcm12134343), 2023-06-28
Supplement: s1 [file s1]

Supplementary Materials

Table S1. Univariable association of caries staging related to demographic and socio-economic determinants.

| Variables               |                                                                      | Total    |        | Caries-free<br>(ICDAS <sub>0</sub> ) | Initial<br>lesion<br>(ICDAS <sub>1-2</sub> ) | Moderate<br>lesion<br>(ICDAS <sub>3-4</sub> ) | Extensive<br>lesion<br>(ICDAS <sub>5-6</sub> ) |
|-------------------------|----------------------------------------------------------------------|----------|--------|--------------------------------------|----------------------------------------------|-----------------------------------------------|------------------------------------------------|
|                         |                                                                      | <i>n</i> | %      | <i>mean</i> ± <i>SD</i>              | <i>mean</i> ± <i>SD</i>                      | <i>mean</i> ± <i>SD</i>                       | <i>mean</i> ± <i>SD</i>                        |
| Gender                  | Males                                                                | 523      | 52.56  | 18.56±3.53                           | 0.98±1.37                                    | 1.02±1.47                                     | 0.73±1.59                                      |
|                         | Females                                                              | 472      | 47.44  | 18.56±3.60                           | 1.06±1.32                                    | 1.03±1.57                                     | 0.65±1.62                                      |
|                         | <i>p-value</i>                                                       |          | 0.106  | 0.947                                | 0.257                                        | 0.721                                         | 0.511                                          |
| Mother's marital status | in couple                                                            | 887      | 90.32  | 18.57±3.55                           | 1.00±1.33                                    | 1.03±1.52                                     | 0.69±1.60                                      |
|                         | not in couple                                                        | 95       | 9.74   | 18.52±3.57                           | 1.14±1.46                                    | 1.01±1.43                                     | 0.69±1.71                                      |
|                         | <i>p-value</i>                                                       |          | <0.001 | 0.197                                | 0.635                                        | 0.944                                         | 0.388                                          |
| Father's marital status | in couple                                                            | 879      | 91.46  | 18.59±3.54                           | 1.01±1.34                                    | 1.03±1.53                                     | 0.68±1.56                                      |
|                         | not in couple                                                        | 82       | 8.53   | 18.51±3.57                           | 1.13±1.47                                    | 1.05±1.45                                     | 0.67±1.73                                      |
|                         | <i>p-value</i>                                                       |          | <0.001 | 0.21                                 | 0.72                                         | 0.74                                          | 0.16                                           |
| Mother's education      | Middle school or below                                               | 433      | 44.0   | 17.52±3.85                           | 1.13±1.39                                    | 1.49±1.7                                      | 1.12±2.05                                      |
|                         | High school or above                                                 | 551      | 55.99  | 19.41±3.06                           | 0.93±1.30                                    | 0.66±1.23                                     | 0.34 ± 1.01                                    |
|                         | <i>p-value</i>                                                       |          | <0.001 | < 0.001                              | 0.027                                        | < 0.001                                       | < 0.001                                        |
| Father's education      | Middle school or below                                               | 486      | 50.47  | 17.74±3.81                           | 1.10±1.37                                    | 1.39±1.68                                     | 1.03±1.92                                      |
|                         | High school or above                                                 | 477      | 49.53  | 19.44±3.02                           | 0.94±1.34                                    | 0.66±1.23                                     | 0.31±0.98                                      |
|                         | <i>p-value</i>                                                       |          | 0.466  | < 0.001                              | 0.055                                        | < 0.001                                       | < 0.001                                        |
| Mother's working status | Employed                                                             | 352      | 35.81  | 19.46±3.03                           | 0.92±1.33                                    | 0.66±1.29                                     | 0.39±1.13                                      |
|                         | Unemployed/Homemaker                                                 | 631      | 64.19  | 18.08±3.71                           | 1.06±1.35                                    | 1.22±1.58                                     | 0.86±1.8                                       |
|                         | <i>p-value</i>                                                       |          | <0.001 | < 0.001                              | 0.022                                        | < 0.001                                       | < 0.001                                        |
| Father's working status | Employed                                                             | 736      | 77.31  | 18.97±3.33                           | 0.96±1.30                                    | 0.87±1.42                                     | 0.5±1.35                                       |
|                         | Unemployed/Homemaker                                                 | 216      | 22.69  | 17.31±3.85                           | 1.21±1.50                                    | 1.5±1.68                                      | 1.25±2.04                                      |
|                         | <i>p-value</i>                                                       |          | <0.001 | < 0.001                              | 0.075                                        | < 0.001                                       | < 0.001                                        |
| Deprivation index       | Least deprived (1 <sup>st</sup> - 2 <sup>nd</sup> quintiles)         | 270      | 27.13  | 19.77±3.01                           | 0.88±1.40                                    | 0.56±1.10                                     | 0.31±1.16                                      |
|                         | Most deprived (3 <sup>rd</sup> - 4 <sup>th</sup> - 5 <sup>th</sup> ) | 725      | 72.86  | 18.11±3.65                           | 1.07±1.32                                    | 1.20±1.61                                     | 0.83±1.72                                      |
|                         | <i>p-value</i>                                                       |          | <0.001 | < 0.001                              | 0.002                                        | < 0.001                                       | < 0.001                                        |
| Municipal District*     | First (5 <sup>th</sup> )                                             | 28       | 2.81   | 15.79±4.53                           | 1.36±1.37                                    | 2.14±1.72                                     | 2.14±3.24                                      |
|                         | Second (5 <sup>th</sup> )                                            | 146      | 14.67  | 18.28±3.56                           | 1.25±1.32                                    | 1.27±1.71                                     | 0.82±1.51                                      |
|                         | Third (3 <sup>rd</sup> )                                             | 125      | 12.56  | 18.9±3.16                            | 0.56±0.95                                    | 0.86±1.42                                     | 0.56±1.27                                      |
|                         | Fourth (1 <sup>st</sup> )                                            | 126      | 12.66  | 19.37±3.66                           | 1.02±1.54                                    | 0.75±1.43                                     | 0.33±0.93                                      |
|                         | Fifth (5 <sup>th</sup> )                                             | 148      | 14.87  | 18.27±3.56                           | 1.47±1.64                                    | 0.98±1.37                                     | 0.77±1.73                                      |
|                         | Sixth (5 <sup>th</sup> )                                             | 174      | 17.49  | 18.51±3.21                           | 0.69±1.11                                    | 0.99±1.43                                     | 0.57±1.41                                      |
|                         | Seventh (4 <sup>th</sup> )                                           | 92       | 9.25   | 16.74±3.66                           | 1.39±1.21                                    | 1.92±1.8                                      | 1.26±1.94                                      |
|                         | Eighth (1 <sup>st</sup> )                                            | 156      | 15.67  | 19.79±3.20                           | 0.83±1.25                                    | 0.53±1.10                                     | 0.42±1.58                                      |
|                         | <i>p-value</i>                                                       |          | <0.001 | <0.001                               | <0.001                                       | <0.001                                        | <0.001                                         |

\* The mode of Deprivation Index quintiles is shown between parentheses

**Table S2.** Caries severity levels (ICDAS) association to diet, behavioural habits and clinical status of the first permanent molar.

| Variables                                           |                | Total |                  | Caries-free (ICDAS <sub>0</sub> ) | Initial lesion (ICDAS <sub>1-2</sub> ) | Moderate lesion (ICDAS <sub>3-4</sub> ) | Extensive lesion (ICDAS <sub>5-6</sub> ) |
|-----------------------------------------------------|----------------|-------|------------------|-----------------------------------|----------------------------------------|-----------------------------------------|------------------------------------------|
|                                                     |                | n     | %                | mean±SD                           | mean±SD                                | mean±SD                                 | mean±SD                                  |
| Daily toothbrushing habit                           | Seldom/Never   | 218   | 22.09            | 17.91±3.83                        | 1.09±1.42                              | 1.32±1.65                               | 0.88±1.79                                |
|                                                     | After meals    | 769   | 77.91            | 18.74±3.47                        | 1.00±1.33                              | 0.94±1.46                               | 0.64±1.55                                |
|                                                     | <i>p-value</i> |       | <b>&lt;0.001</b> | 0.048                             | 0.664                                  | 0.006                                   | 0.032                                    |
| PFM affected by caries                              | No             | 731   | 73.47            | 19.21±3.31                        | 0.54±0.91                              | 0.74±1.31                               | 0.47±1.31                                |
|                                                     | Yes            | 264   | 26.53            | 16.75±3.64                        | 2.34±1.47                              | 1.81±1.75                               | 1.30±2.11                                |
|                                                     | <i>p-value</i> |       | <b>&lt;0.001</b> | <b>&lt;0.001</b>                  | <b>&lt;0.001</b>                       | <b>&lt;0.001</b>                        | <b>&lt;0.001</b>                         |
| Orthodontic devices                                 | No/Former      | 966   | 99.18            | 18.55±3.57                        | 1.03±1.35                              | 1.02±1.51                               | 0.70±1.62                                |
|                                                     | Current        | 8     | 0.82             | 18.88±4.45                        | 0.63±1.06                              | 1.38±2.07                               | 0.75±1.39                                |
|                                                     | <i>p-value</i> |       | <b>&lt;0.001</b> | 0.512                             | 0.652                                  | 0.487                                   | 0.680                                    |
| Additional fluoride products use                    | No             | 750   | 76.53            | 18.34±3.64                        | 1.02±1.37                              | 1.08±1.52                               | 0.74±1.65                                |
|                                                     | Yes            | 230   | 23.47            | 19.33±3.16                        | 1.03±1.29                              | 0.80±1.45                               | 0.47±1.35                                |
|                                                     | <i>p-value</i> |       | <b>&lt;0.001</b> | 0.012                             | 0.759                                  | 0.002                                   | 0.052                                    |
| Chewing-gum consumption                             | Seldom/Never   | 857   | 87.63            | 18.82±3.41                        | 1.01±1.36                              | 0.91±1.44                               | 0.59±1.45                                |
|                                                     | Always/Often   | 121   | 12.37            | 16.78±4.05                        | 1.05±1.20                              | 1.74±1.78                               | 1.43±2.35                                |
|                                                     | <i>p-value</i> |       | <b>&lt;0.001</b> | < 0.001                           | 0.173                                  | <0.001                                  | <0.001                                   |
| Daily fruit consumption                             | ≤ 2x/day       | 725   | 77.37            | 18.83±3.43                        | 0.99±1.34                              | 0.92±1.45                               | 0.58±1.43                                |
|                                                     | > 2x/day       | 212   | 22.62            | 17.74±3.85                        | 1.15±1.41                              | 1.38±1.65                               | 0.96±1.97                                |
|                                                     | <i>p-value</i> |       | <b>&lt;0.001</b> | 0.001                             | 0.148                                  | < 0.001                                 | 0.008                                    |
| Weekly dairy product consumption                    | < 2x/week      | 397   | 40.72            | 18.03±3.76                        | 1.08±1.43                              | 1.16±1.62                               | 0.93±1.84                                |
|                                                     | ≥ 2x/week      | 578   | 59.28            | 18.93±3.39                        | 0.97±1.28                              | 0.92±1.42                               | 0.53±1.41                                |
|                                                     | <i>p-value</i> |       | <b>&lt;0.001</b> | 0.015                             | 0.719                                  | 0.081                                   | <0.001                                   |
| Sugary drinks/sweetened pacifier use before bedtime | Seldom/Never   | 880   | 94.52            | 18.81±3.38                        | 1.01±1.34                              | 0.95±1.47                               | 0.57±1.36                                |
|                                                     | Always/Often   | 51    | 5.47             | 16.39±4.57                        | 1.04±1.52                              | 1.59±1.71                               | 1.88±3.22                                |
|                                                     | <i>p-value</i> |       | <b>&lt;0.001</b> | 0.001                             | 0.679                                  | 0.005                                   | 0.007                                    |
| Eating snacks between meals                         | Seldom/Never   | 649   | 66.63            | 18.71±3.52                        | 1.06±1.37                              | 0.98±1.52                               | 0.60±1.49                                |
|                                                     | Always/Often   | 325   | 33.37            | 18.23±3.64                        | 0.94±1.30                              | 1.07±1.53                               | 0.86±1.81                                |
|                                                     | <i>p-value</i> |       | <b>&lt;0.001</b> | 0.08                              | 0.28                                   | 0.48                                    | <0.01                                    |
| Sweet drinks/carbonated drinks consumption          | Seldom/Never   | 667   | 68.06            | 18.97±3.24                        | 1.02±1.35                              | 0.86±1.44                               | 0.51±1.33                                |
|                                                     | Always/Often   | 313   | 31.94            | 17.77±4.05                        | 1.02±1.33                              | 1.32±1.59                               | 1.07±2.04                                |
|                                                     | <i>p-value</i> |       | <b>&lt;0.001</b> | 0.001                             | 0.935                                  | <0.001                                  | <0.001                                   |
| Dental visit in the previous year                   | ≤ 2x/year      | 888   | 90.89            | 18.82±3.39                        | 0.99±1.33                              | 0.91±1.43                               | 0.57±1.50                                |
|                                                     | > 2x/year      | 89    | 9.11             | 16.55±4.18                        | 1.25±1.44                              | 1.87±1.93                               | 1.64±1.93                                |
|                                                     | <i>p-value</i> |       | <b>&lt;0.001</b> | 0.001                             | 0.056                                  | <0.001                                  | <0.001                                   |

PFM: Primary First Molar
